# Supplementary material for: Biomarkers of Frailty: miRNAs as Common Signatures of Impairment in Cognitive and Physical Domains
Source: MDPI journal article supplement (doi:10.3390/biology11081151), 2022-07-31
Supplement: s1 [file s1]

**Table S1:** A summary of microRNAs (miRNAs) associated with pathways related to physical frailty in humans

| <b>MiRNA</b>                                             | <b>Function in physical/cognitive domains</b>                                                                                | <b>Direction of regulation</b>                                                                       | <b>References</b>    |
|----------------------------------------------------------|------------------------------------------------------------------------------------------------------------------------------|------------------------------------------------------------------------------------------------------|----------------------|
| miR-1                                                    | Promoter of skeletal muscle differentiation and regeneration                                                                 | Decreased in muscle impairment<br>Increased after acute exercise                                     | [72]<br>[73]         |
| <b>miR-9</b><br>( <b>miR-9-1, miR-9-2, and miR-9-3</b> ) | Inhibitor of Skeletal Muscle Satellite Cell Proliferation                                                                    | Decreased after acute exercise                                                                       | [73,74,75]           |
| miR10a-5p<br>miR10a-3p                                   | Inhibitor of myogenic differentiation<br>Negative Regulator ossification                                                     | Increased in osteoporosis<br><br>Increased in muscle loss                                            | [76]<br><br>[68]     |
| miR-19a/b                                                | Inflammatory responses, muscle cell apoptosis; fat-free mass metabolism                                                      | Increased in sarcopenia                                                                              | [77,78]              |
| <b>miR-21</b>                                            | Muscle atrophy following denervation; muscle regeneration; myogenic differentiation of satellite cells; inflamm-miR; mitomiR | Increased in sarcopenia<br><br>Increased levels led to fewer and smaller myotubes in satellite cells | [67]<br><br>[79]     |
| miR-21-5p                                                | Osteogenic differentiation                                                                                                   | Decreased in osteoporosis<br>Increased in osteoporosis                                               | [80]<br>[81,82]      |
| miR-22-3p                                                | Smooth muscle cell differentiation; Regulation of endothelial cell proliferation                                             | Increased in osteoporosis                                                                            | [76]                 |
| <b>miR-23a-3p</b>                                        | Inhibitor of myogenic differentiation                                                                                        | Increased in osteoporosis;<br>Increased in muscle impairment;<br>Decreased after acute exercise      | [81]<br>[72]<br>[73] |
| miR-24-3p                                                | Inhibitor of myogenic differentiation                                                                                        | Increased in osteoporosis;                                                                           | [81]                 |
| <b>miR-26a</b>                                           | Promoter of myogenic differentiation                                                                                         | Increased in skeletal muscle regeneration after injury                                               | [83]                 |
| <b>miR-27a</b>                                           | Satellite cell proliferation; Promoter of myoblast differentiation; mitomiR                                                  | Overexpression in muscle prevents diabetes-induced muscle cachexia                                   | [84]                 |

|                   |                                                                                                                       |                                                                                                                                                                                                       |                                               |
|-------------------|-----------------------------------------------------------------------------------------------------------------------|-------------------------------------------------------------------------------------------------------------------------------------------------------------------------------------------------------|-----------------------------------------------|
| <b>miR-29b</b>    | Myotube formation; myoblast proliferation; mitomiR                                                                    | Increased in muscle atrophy cellular models                                                                                                                                                           | [85]                                          |
| <b>miR-30a-3</b>  | Skeletal muscle protein turnover and atrophy                                                                          | Increased in muscle atrophy cellular models                                                                                                                                                           | [86]                                          |
| miR-31            | Regulation of myogenic transcription factors; mitomiR                                                                 | Decreased after acute exercise                                                                                                                                                                        | [73]                                          |
| <b>miR-34a/c</b>  | Muscle protein synthesis; targeting of cell senescence factors; mitomiR<br>Myoblast proliferation and differentiation | Increased in sarcopenia<br><br>Increased during myogenesis in muscle cellular model                                                                                                                   | [84]<br>[87]                                  |
| <b>miR92a-3p</b>  | Oxidative stress; endothelial dysfunction; mitomiR                                                                    | Increased in physical decline                                                                                                                                                                         | [68]                                          |
| <b>miR-93</b>     | Inhibitor of myogenic differentiation                                                                                 | Increased in osteoporosis                                                                                                                                                                             | [81]                                          |
| miR-100-5p        | Inhibitor of myogenic differentiation                                                                                 | Increased in osteoporosis                                                                                                                                                                             | [81]                                          |
| miR-122a-5p       | Inhibitor of myogenic differentiation                                                                                 | Increased in osteoporosis                                                                                                                                                                             | [81,82]                                       |
| <b>miR-124</b>    | Inhibitor of myogenic differentiation; inflamm-miR                                                                    | Increased in osteoporosis                                                                                                                                                                             | [72]                                          |
| <b>miR-125b</b>   | Inhibitor of myogenic differentiation                                                                                 | Increased in osteoporosis<br>Decreased in muscle impairment                                                                                                                                           | [72,81,82]                                    |
| miR-133a/b        | Satellite cell proliferation; Myoblast differentiation                                                                | Decreased in sarcopenic patients;<br>Increased in osteoporosis<br><br>Decreased in osteoporosis and muscle impairment;<br>Increased after acute exercise<br>High levels protective for muscle atrophy | [80,88,89,90]<br><br>[72,76];<br>[73]<br>[91] |
| miR-139-5p        | Myogenic differentiation; cell growth                                                                                 | Decreased in osteogenic differentiation in human mesenchymal cells                                                                                                                                    | [92]                                          |
| <b>miR-142-3p</b> | Osteoblast differentiation                                                                                            | Increased in osteoblast differentiation in human mesenchymal cells                                                                                                                                    | [93]                                          |
| miR-142-5p        | Muscle homeostasis                                                                                                    | Down-regulated in frailty subjects                                                                                                                                                                    | [69]                                          |

|                                             |                                                                                       |                                                                                                                                           |                                       |
|---------------------------------------------|---------------------------------------------------------------------------------------|-------------------------------------------------------------------------------------------------------------------------------------------|---------------------------------------|
| miR-143-3p                                  | Inhibitor of myogenic differentiation                                                 | Upregulated in hypertrophic response in human skeletal muscle                                                                             | [94]                                  |
| <b>miR-146a</b>                             | Promoter of satellite cell differentiation; inflamm-miR                               | Dysregulated in muscle disorders; Increased in osteoarthritic patients; Down-regulated in sarcopenia                                      | [95 (and references therein)]<br>[89] |
| miR-148a-3p                                 | Inhibitor of myogenic differentiation                                                 | Increased in osteoporosis                                                                                                                 | [81]                                  |
| miR-151a                                    | Cell proliferation; mitomiR                                                           | High levels protective for muscle atrophy                                                                                                 | [91]                                  |
| <b>miR-155</b>                              | Inhibitor of myogenic differentiation; inflamm-miR; mitomiR                           | Increased in aged muscle cells; Down-regulated in sarcopenia                                                                              | [96]<br>[89]                          |
| <b>miR-181 (miR-181a-miR-181b-miR-181c)</b> | Myogenic differentiation; inflamm-miR; mitomiR                                        | Decreased in aged muscle; Overexpression in osteogenesis Increased after acute exercise                                                   | [97]<br>[51]<br>[73]                  |
| miR185-3p                                   | Cell migration; angiogenesis; regulation of LDL clearance                             | Increased in physical decline                                                                                                             | [68]                                  |
| <b>miR-186</b>                              | Muscle differentiation, development and muscular atrophy                              | Increased levels decrease myogenin expression in primary muscle cells;                                                                    | [98]                                  |
| miR-187                                     | Promoter of myogenic differentiation                                                  | Decreased in osteoporosis                                                                                                                 | [99]                                  |
| miR-194-3p<br>miR-194-5p                    | Muscle atrophy; lipid accumulation in skeletal muscle cells; myogenic differentiation | Increased in muscle loss; Increased in osteoporosis                                                                                       | [68]<br>[100]                         |
| miR-195                                     | Control of satellite cell quiescence; mitomiR                                         | Overexpression of miR-195/497 enhances myogenesis                                                                                         | [101]                                 |
| miR-203a-3p                                 | Skeletal muscle protein turnover and atrophy                                          | Increased in muscle atrophy cellular models<br>Increased levels correlate with muscle mass index and intramuscular adipose tissue content | [86]<br>[102]                         |
| <b>miR-206</b>                              | Myoblast differentiation and regeneration                                             | Decreased in muscle impairment; High levels protective for muscle atrophy                                                                 | [67,72,91]                            |

|                |                                                                      |                                                                                                 |               |
|----------------|----------------------------------------------------------------------|-------------------------------------------------------------------------------------------------|---------------|
| miR-208a/b     | Promoter of myogenic differentiation; specification of muscle fibres | Increased levels in response to endurance exercise in healthy men; Down-regulated in sarcopenia | [103]<br>[89] |
| <b>miR-210</b> | Inflamm-miR; overexpression protects from muscular damage            | Down-regulated in sarcopenia                                                                    | [89]          |
| miR-222        | Differentiation of skeletal muscle cells                             | Down-regulated in sarcopenia                                                                    | [89]          |
| miR-326        | Cell proliferation and apoptosis                                     | Increased in muscle loss                                                                        | [68]          |
| miR-328        | Promoter of myogenic differentiation                                 | Decreased in osteoporosis; Down-regulated in sarcopenia                                         | [76]<br>[89]  |
| miR-422a       | Regulation of cell growth and proliferation                          | Increased in osteoporosis                                                                       | [104]         |
| miR424a-5p     | Regulation of cell growth and proliferation                          | Increased in muscle wasting                                                                     | [105]         |
| miR-431        | Myogenic differentiation and muscle regeneration                     | Decreased levels in aged myoblast                                                               | [106]         |
| miR-449b-5p    | Cell cycle control and differentiation                               | Increased levels in old muscle samples                                                          | [51, 78]      |
| <b>miR-486</b> | Myoblast differentiation; muscle atrophy                             | Decreased in muscle impairments                                                                 | [72,95]       |
| miR-489        | Control of satellite cell quiescence                                 | Overexpression suppresses muscle regeneration                                                   | [107]         |
| miR-497        | Control of satellite cell quiescence                                 | Overexpression enhances myogenesis in cellular models                                           | [101]         |
| miR-499        | Biomarker of muscle atrophy; mitomiR                                 | Down-regulated in sarcopenia                                                                    | [89]          |
| miR-503        | Promoter of myogenic differentiation                                 | Induced during muscle differentiation in cellular models                                        | [108]         |
| miR-518f       | Inhibitor of myogenic differentiation                                | Increased in osteoporosis                                                                       | [99]          |
| miR-532-5p     | Osteoblast differentiation                                           | Increased in physical frailty; Decreased in osteogenic cell model                               | [68]<br>[109] |
| miR-675        | Myogenic differentiation                                             | Increased in low muscle mass                                                                    | [110]         |
| miR-760        | Inhibitor of proliferation and differentiation in myoblasts          | Increased in muscle loss                                                                        | [68]          |
| <b>miR-874</b> | Osteogenic differentiation                                           | Decreased in osteoporosis                                                                       | [111]         |
