# Supplementary material for: Biomarkers of Frailty: miRNAs as Common Signatures of Impairment in Cognitive and Physical Domains
Source: MDPI journal article supplement (doi:10.3390/biology11081151), 2022-07-31
Supplement: s1 [file s1]

**Table S2:** A summary of microRNAs (miRNAs) associated with pathways related to cognitive frailty in humans

| <b>MiRNA</b>                                           | <b>Function in physical/<i>cognitive</i> domains</b>                                                                    | <b>Direction of regulation</b>                                                                              | <b>References</b> |
|--------------------------------------------------------|-------------------------------------------------------------------------------------------------------------------------|-------------------------------------------------------------------------------------------------------------|-------------------|
| <b>miR-9</b><br><b>(miR-9-1, miR-9-2, and miR-9-3)</b> | Promoter of neural progenitor proliferation CNS development; microglia activation; regulation of Lamina A transcription | Decreased in neurodegenerative traits                                                                       | [125]             |
| miR-20a                                                | Cell proliferation and differentiation; apoptosis; APP proteolysis                                                      | Decreased in cognitive impairment                                                                           | [126]             |
| <b>miR-21</b>                                          | Angiogenesis, cell differentiation and apoptosis; anti-inflammatory                                                     | Increased in human glioma cells, in SH-Y5Y cells and in LPS induced macrophages. Increased in CNS disorders | [127]             |
| <b>miR-23a-3p</b>                                      | Neuroprotection from $\beta$ -amyloid toxicity                                                                          | Decreased in the frontal cortex of MCI subjects                                                             | [128]             |
| <b>miR-26b</b>                                         | Synaptic maturation; Dendritic branching                                                                                | Inhibition neuroprotective against oxidative stress                                                         | [129]             |
| <b>miR-27a-3p</b>                                      | Regulation of NF-kB activity, cholesterol esterification and LDL particles clearance; mitomiR                           | Decreased in cognitive impairment                                                                           | [126]             |
| <b>miR-29c</b>                                         | Synaptic plasticity; A $\beta$ clearance; dendritic branching; mitomiR                                                  | Increased levels associate with preserved cognitive function                                                | [130]             |
| <b>miR-30b</b>                                         | Synaptic plasticity                                                                                                     | Decreased in cognitive impairment                                                                           | [131]             |

|                       |                                                                                                                     |                                                                                                                                                |                         |
|-----------------------|---------------------------------------------------------------------------------------------------------------------|------------------------------------------------------------------------------------------------------------------------------------------------|-------------------------|
| <b>miR-34a/c</b>      | Synaptic transmission; A $\beta$ clearance; Hypocampal function; neurotransmitter release; dendritic loss; mitomiR; | Increased in age-related inflammatory-neurodegeneration;<br>Increased in learning and memory impairment                                        | [132]<br>[133]          |
| <b>miR92a-3p</b>      | Synaptic transmission; mitomiR                                                                                      | Increased in schizophrenia, altered synaptic function in MCI                                                                                   | [68,69]                 |
| <b>miR-93</b>         | Angiogenesis; inflammatory response                                                                                 | Increased in vascular impairment                                                                                                               | [134]                   |
| miR-103a              | APP proteolysis                                                                                                     | Decreased in cognitive impairment                                                                                                              | [126]                   |
| <b>miR-124</b>        | Regulation of alternative splicing in neurons; microglial polarization; inflamm-miRNA                               | Downregulation inhibits neuroinflammation in cellular models of neurodegeneration                                                              | [135]                   |
| <b>miR-125b</b>       | Synaptic transmission; neurotransmitter release; tau phosphorylation                                                | Increased levels related to neurotoxicity;<br>Increased in MCI                                                                                 | [136]<br>[137]          |
| miR-128               | Modulator of intracellular calcium content                                                                          | Increased in MCI                                                                                                                               | [137]                   |
| miR-132<br>miR-132-3p | Regulator of cholinergic signaling; synaptic plasticity; tau aggregation; mitochondrial decline                     | Increased in dementia and decreased in non-demented centenarians<br>Increased levels in MCI patients<br>Decreased levels protect from dementia | [138]<br>[137,139,140], |
| miR-134               | Synaptic plasticity                                                                                                 | Downregulation is neuroprotective in cellular models<br>Increased levels in cognitive impairment<br>Increased in MCI                           | [141]<br>[142]<br>[137] |
| miR-135               | Modulator of the brain's response to physical exercise                                                              | Increased in exosome from MCI subjects                                                                                                         | [143]                   |

|                                                                 |                                                                                                       |                                                                                                                                   |                |
|-----------------------------------------------------------------|-------------------------------------------------------------------------------------------------------|-----------------------------------------------------------------------------------------------------------------------------------|----------------|
| miR-137                                                         | Neuronal cell proliferation and differentiation; Pre-synaptic plasticity                              | Overexpression upregulated target genes related to synaptic modulation in cognitive and psychiatric disorders                     | [144]          |
| miR-138-5p                                                      | Synaptic plasticity; tau phosphorylation                                                              | Overexpression associates to decreased memory performance                                                                         | [145]          |
| miR-140-5p                                                      | Negative regulator of ADAM10 and its transcription factor SOX2, activated by A $\beta$                | Predictor of cognitive decline<br>Up-regulated in dementia                                                                        | [146]<br>[147] |
| <b>miR-142-3p</b>                                               | Regulatory T Cell Function; cell proliferation                                                        | Increased in different kind of dementia                                                                                           | [131]          |
| <b>miR-146a</b>                                                 | Regulator of the NF- $\kappa$ b pathway; tau phosphorylation; inflamm-miRNA;                          | Increased in neurodegenerative conditions;<br>Overexpressed in MCI                                                                | [120]<br>[148] |
| <b>miR-155</b>                                                  | Neuroinflammation; microglial activation; regulation of immune response; inflamm-miR; mitomiR         | Increased in neurodegenerative conditions                                                                                         | [120]          |
| <b>miR-181</b><br><b>(miR-181a-<br/>miR-181b-<br/>miR-181c)</b> | Synaptic plasticity; neuroinflammation; A $\beta$ clearance; apoptosis; inflamm-miR; mitomiR          | Overexpression in MCI patients who later convert to AD                                                                            | [148]          |
| <b>miR-186-5p</b>                                               | Synaptic signalling; Amyloid-beta formation                                                           | Upregulated in AD pathogenesis                                                                                                    | [149]          |
| miR-193b                                                        | Regulator of APP                                                                                      | Increased in exosome from MCI patients                                                                                            | [143,150]      |
| miR200a-3p                                                      | A $\beta$ accumulation, apoptosis                                                                     | Increased in different kind of dementia                                                                                           | [131]          |
| miR-204                                                         | Cell migration and differentiation; microglial activation; IL6 production; prostaglandin biosynthesis | Down-regulated in hippocampal sclerosis<br><br>Upregulated in serum samples from patients affected by neurodegenerative disorders | [151]<br>[152] |

|                   |                                                                   |                                                          |       |
|-------------------|-------------------------------------------------------------------|----------------------------------------------------------|-------|
| <b>miR-206</b>    | Synaptic maturation                                               | Increased levels in MCI patients                         | [139] |
| <b>miR-210</b>    | Vesicular trafficking; synaptic plasticity; Inflamm-miR;          | Decreased levels correlate with increase in MCI severity | [153] |
| miR-212           | Neuroprotection from A $\beta$ -amyloid toxicity                  | Decreased levels protect from dementia                   | [140] |
| miR-218           | Synaptic trafficking                                              | Down-regulated in hyppocampal sclerosis                  | [151] |
| miR-223           | Granulocyte differentiation and myeloid progenitor proliferation. | Increased in neurodegenerative conditions                | [120] |
| miR-323-3p        | Amyloid precursor protein biosynthesis                            | Increased in MCI                                         | [137] |
| miR-382           | Cell proliferation and angiogenesis                               | Increased in MCI                                         | [137] |
| miR-384           | Cell proliferation and angiogenesis                               | Increased in exosome from MCI patients                   | [143] |
| miR483-5p         | Synaptic plasticity                                               | Increased in different kind of dementia                  | [131] |
| <b>miR-486-5p</b> | Synaptic plasticity                                               | Increased in different kind of dementia                  | [131] |
| miR-491-5p        | Regulation of cell migration                                      | Increased in MCI patients                                | [137] |
| miR-501-3p        | Synaptic transmission                                             | Decreased levels correlate with lower MMSE               | [154] |
| miR-502-3p        | Cell proliferation                                                | Increased in different kind of dementia                  | [131] |
| <b>miR-874</b>    | Cell proliferation                                                | Increased in MCI patients                                | [137] |
